# Supplementary material for: Reexamining the role of TACI coding variants in common variable immunodeficiency and selective IgA deficiency
Source: Springer Nature journal article supplement (doi:10.1038/ng0407-429), 2007-03-28
Supplement: 41588_2007_BFng0407429_MOESM199_ESM.pdf [file 41588_2007_BFng0407429_MOESM199_ESM.pdf]

**Supplementary Table 2.** Primer sequences for detection of *TNFRSF13B* mutation/sequence variants using a SNP based mutation assay.

---

| Mutations/sequence variants | Primer 1                       | Primer 2                       | Extension primer    |
|-----------------------------|--------------------------------|--------------------------------|---------------------|
| ins204A                     | ACGTTGGATGAGTTCCTGCTAGTCTGTGTC | ACGTTGGATGAGAACTTGCCTTGCTCCTTG | TCTCTCTCCCAGGGTCA   |
| R202H                       | ACGTTGGATGAGTTTCATGCACTCACCTG  | ACGTTGGATGCTGCTTCCTCAAGAAGAGGG | ACTTGCCCGACTTTGA    |
| C104R                       | ACGTTGGATGTCTGTGGACAGCACCTAAG  | ACGTTGGATGTCTGGTGAAGGTTCACTGG  | AAGCAATGTGCATACTTC  |
| A181E                       | ACGTTGGATGATCAGGTGGCCCTGGTCTAC | ACGTTGGATGCCCTCTTCTTGAGGAAGCAG | CTCTGCTGCTTCCTGGTGG |
| R72H                        | ACGTTGGATGGGTCATAGAACTTGCCTTGC | ACGTTGGATGAGTTCCTGCTAGTCTGTGTC | CTTGCCTTGCTCCTTG    |
| R122W                       | ACGTTGGATGAACCTTCCACCAGAGCTCAG | ACGTTGGATGTCCAATCCTTGGTACCTTCC | AGAGCTCAGGAGACAG    |
| P251L                       | ACGTTGGATGCCCACCTTCCAGCACAAAGT | ACGTTGGATGAGCTTCTGCTTCCCTGAGTG | AGCACAAAGTGGGGTCG   |
| V220A                       | ACGTTGGATGTGCAGATCACGCGATGGAAG | ACGTTGGATGAAGCAGAAGCTGCAGGTCTC | GAAGCCGGCAGCCCTG    |

---
